# Supplementary material
Source: ML conference proceedings conference paper supplement (https://aclanthology.org/2020.acl-main.720)

(a) Performance of Pruned Byte CRF (CoNLL)

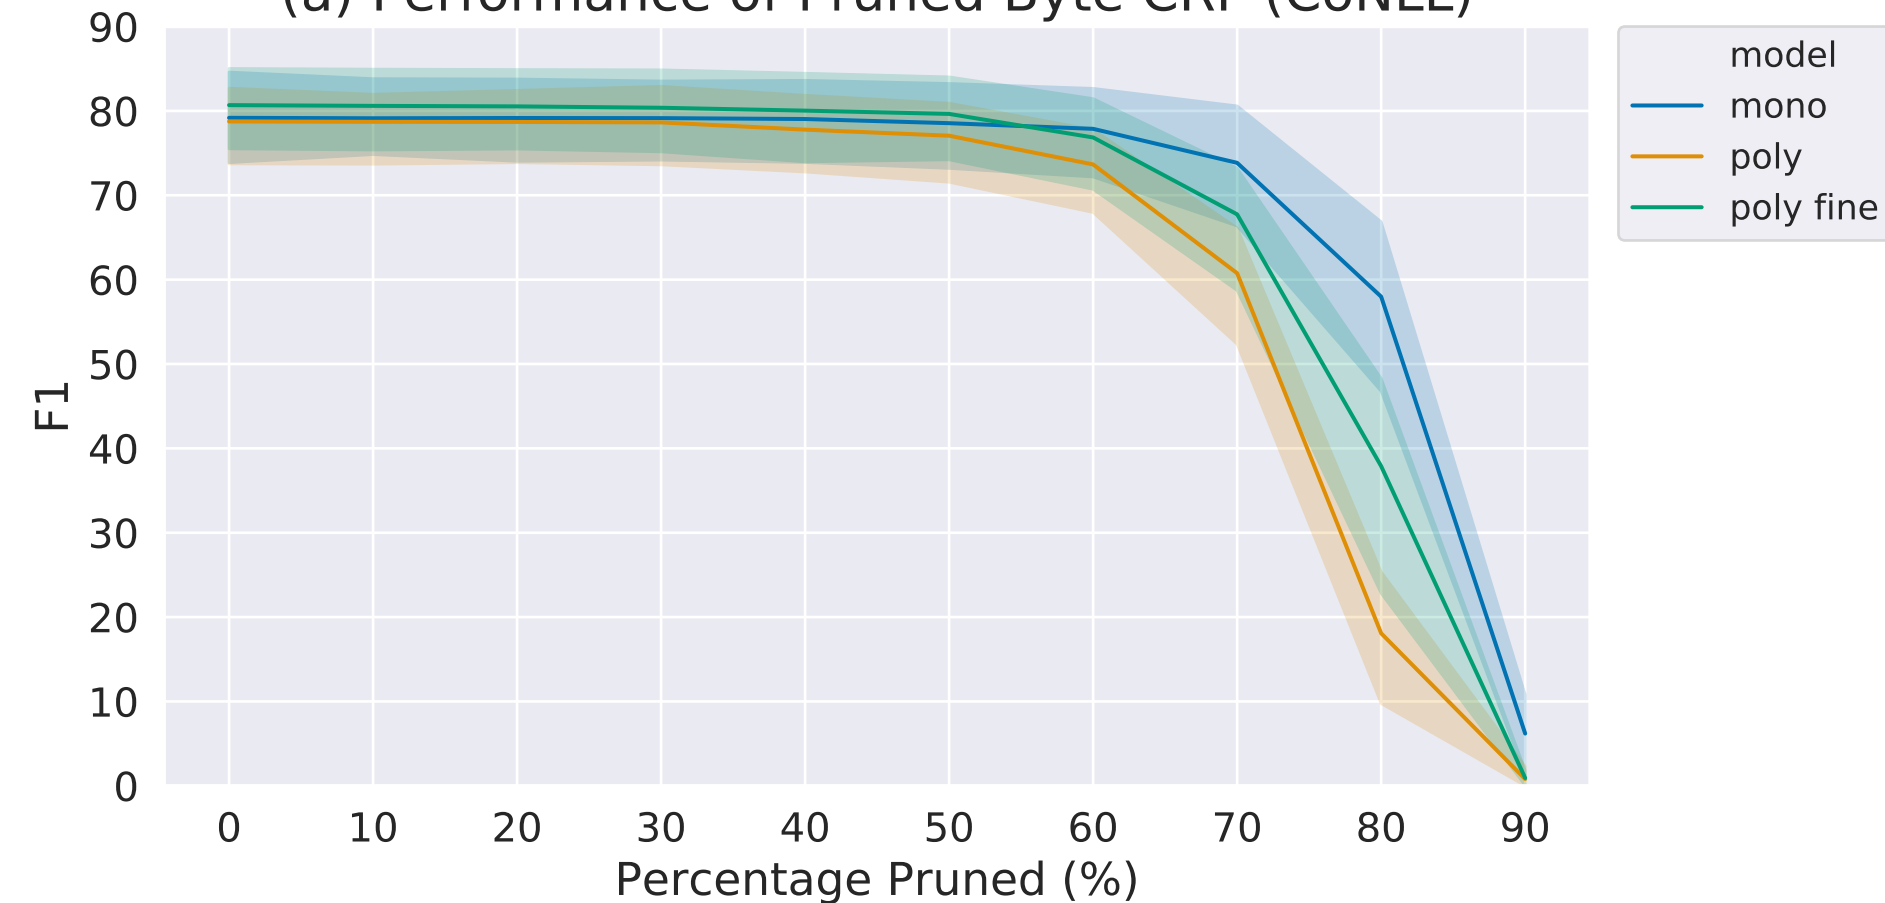

(b) Performance of Pruned Byte CRF (LORELEI)

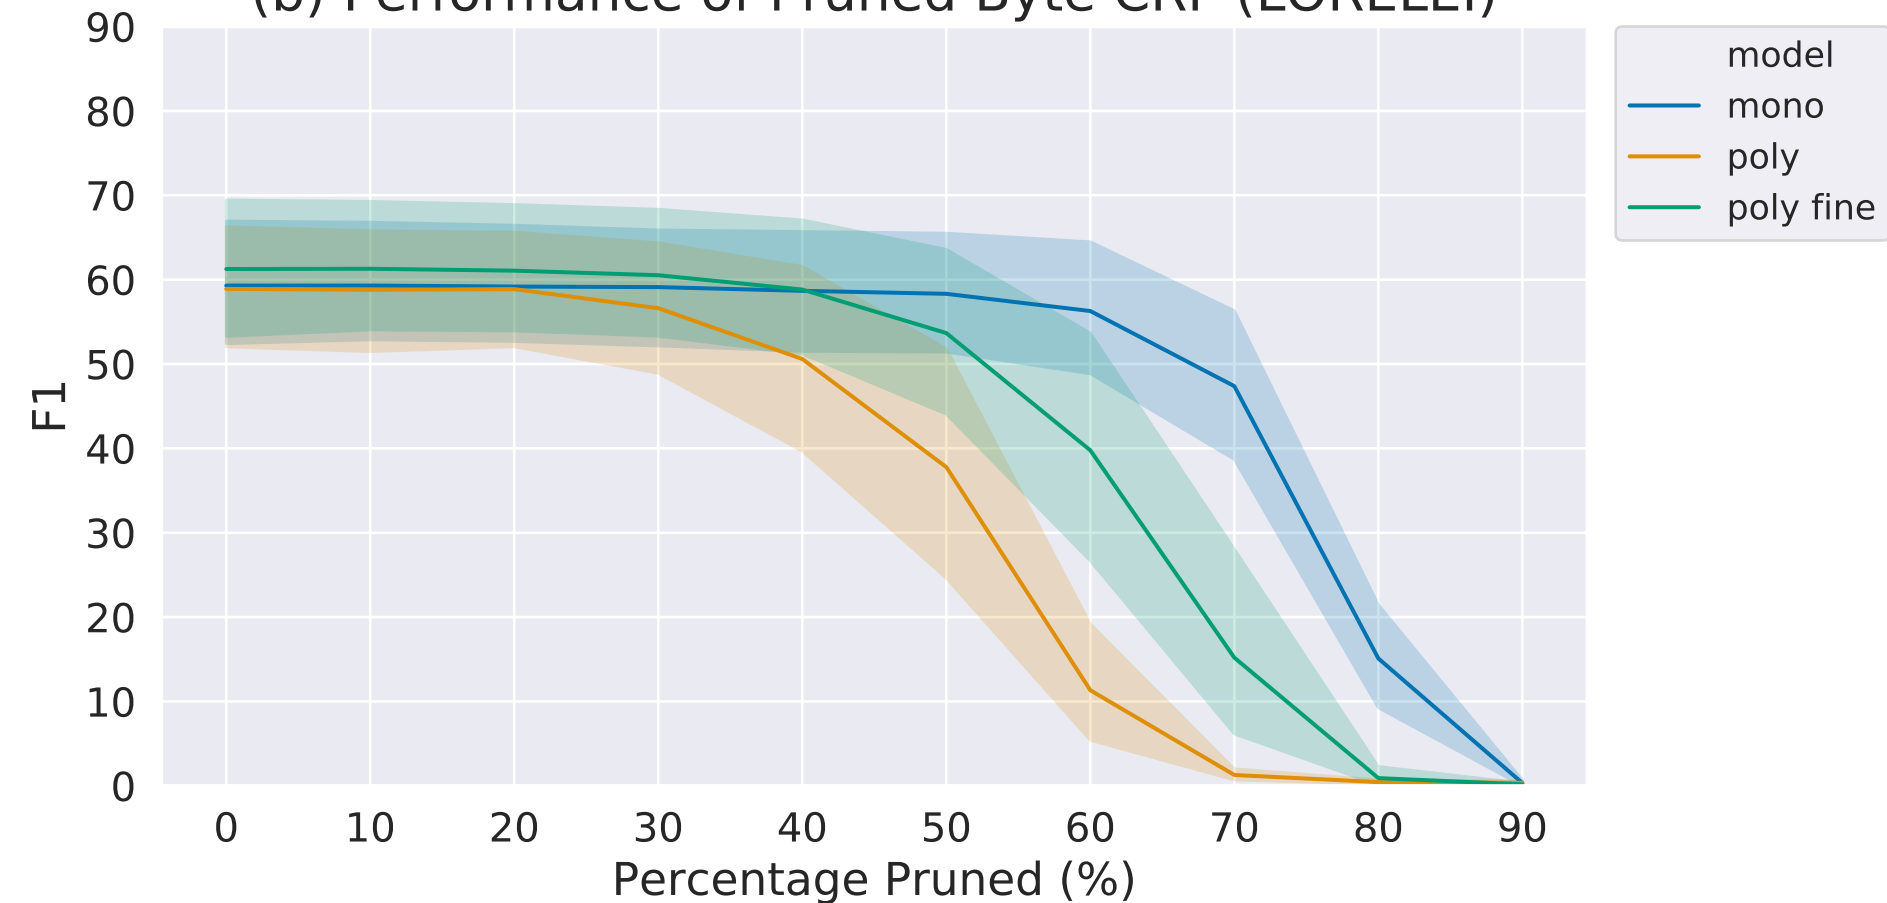

(c) Pruning Thresholds for Byte CRF (CoNLL)

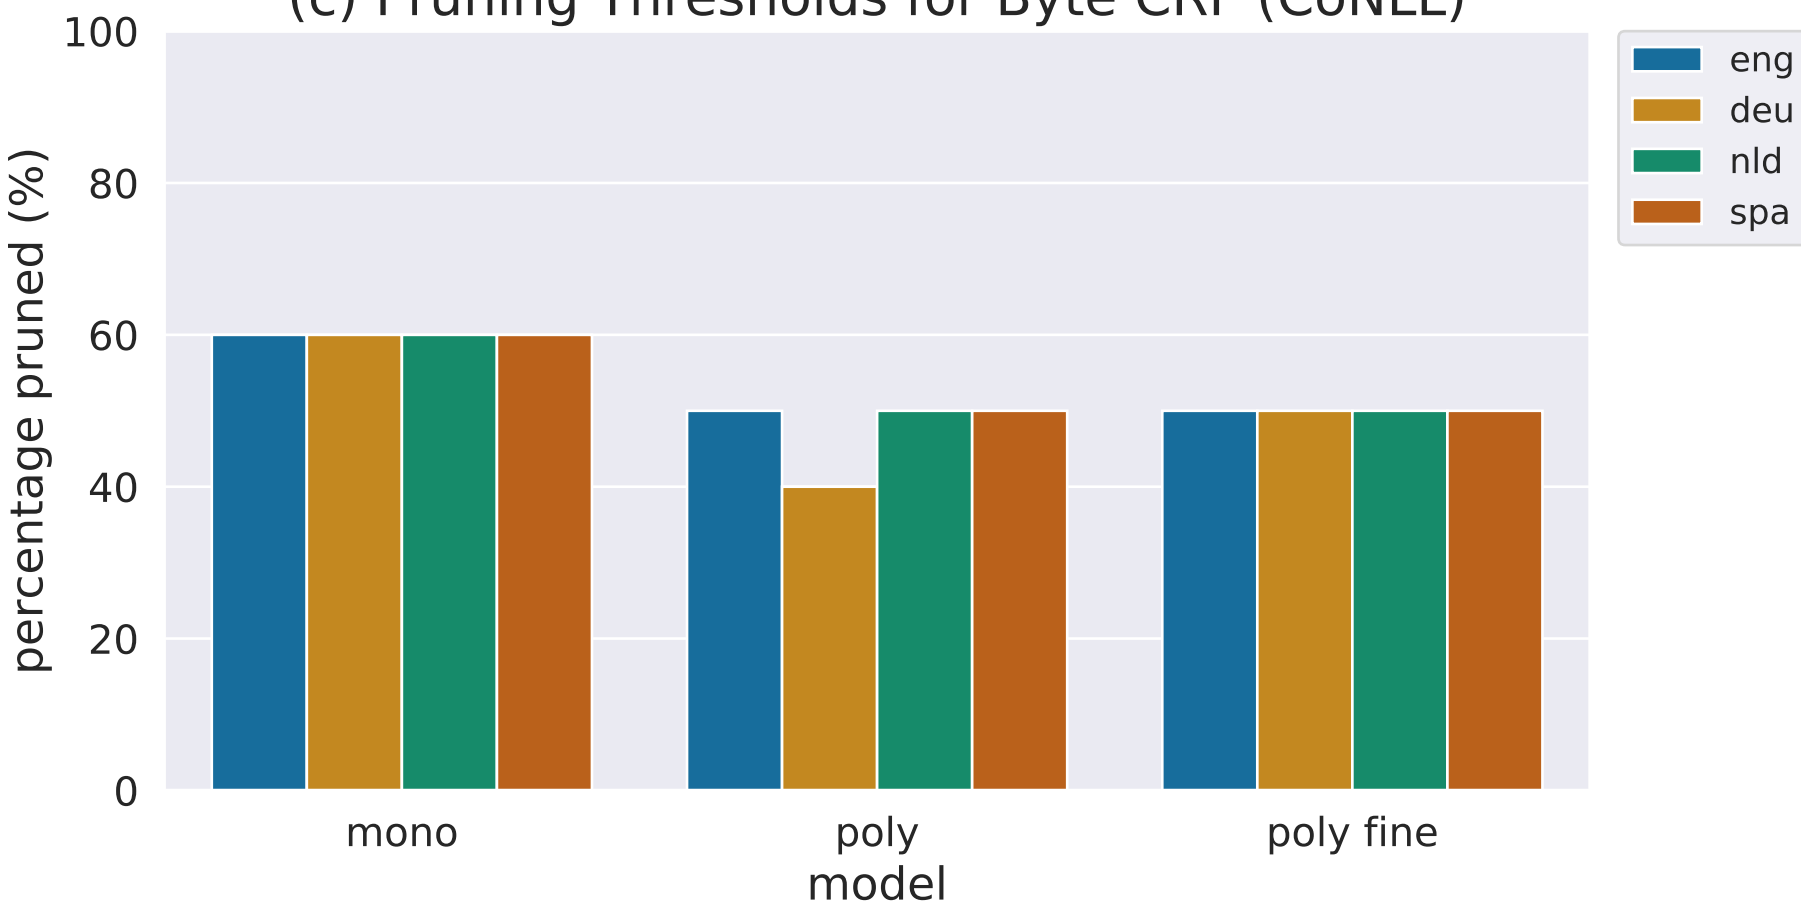

(d) Pruning Thresholds for Byte CRF (LORELEI)

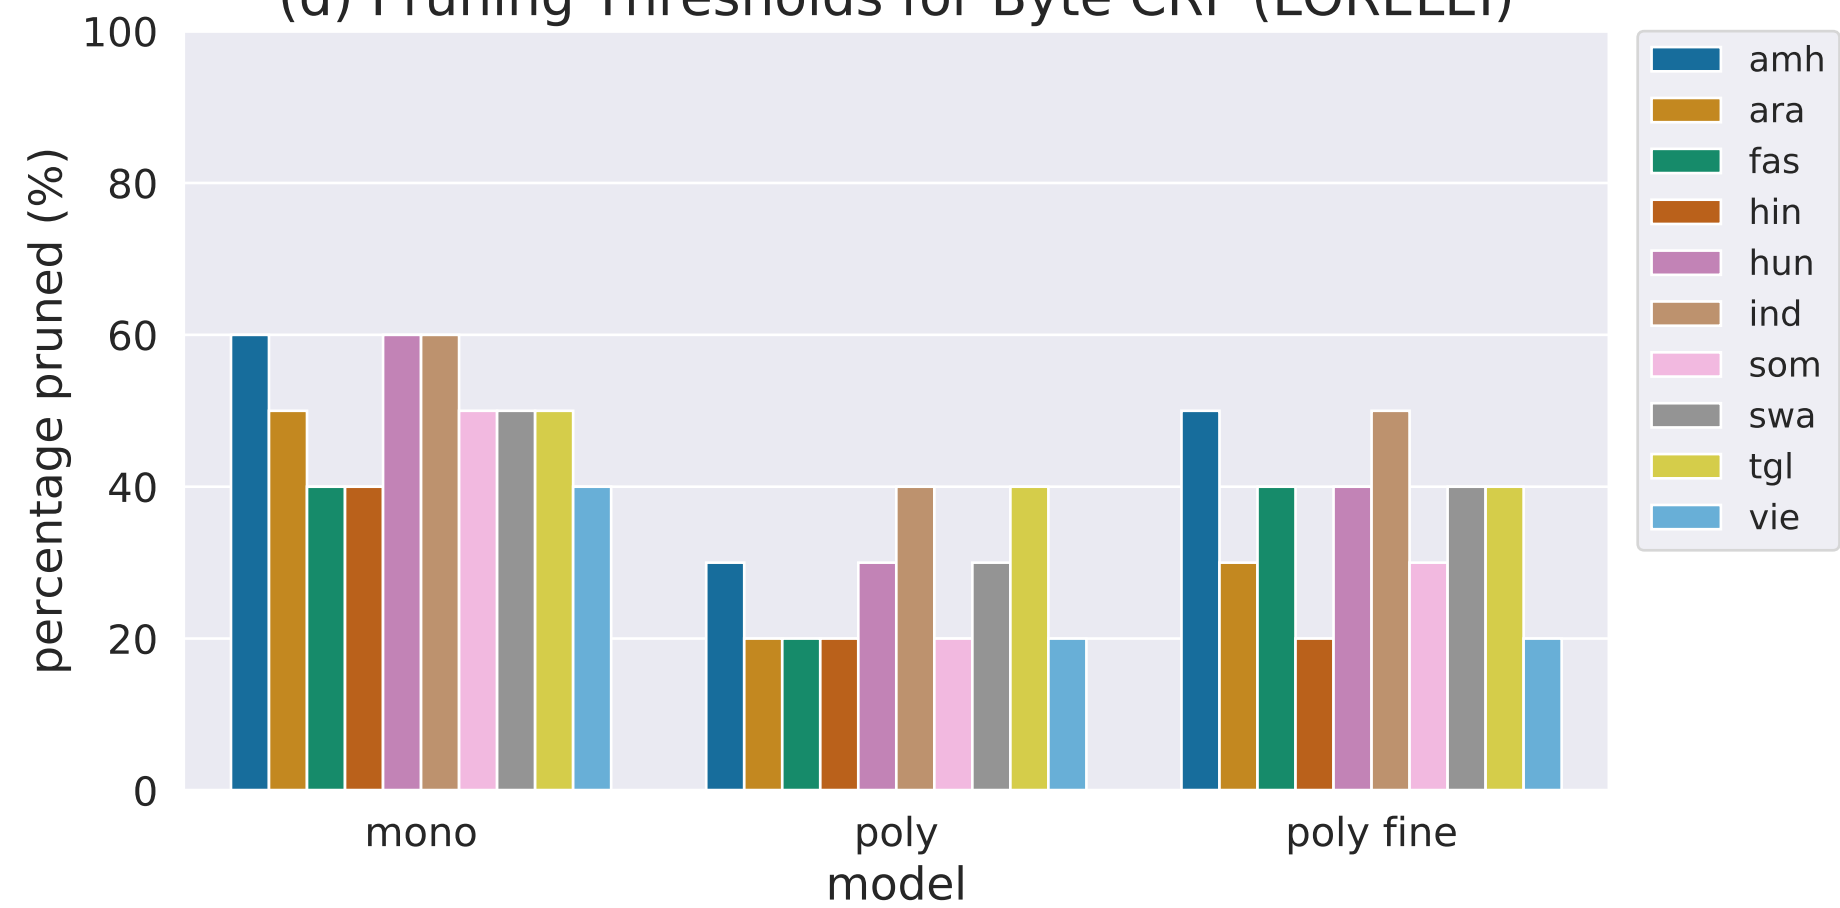

Supplement: Software [file 2020.acl-main.720.Software.zip]
