# Supplementary material
Source: ML conference proceedings conference paper supplement (https://aclanthology.org/2020.acl-main.720)

# Errors on Common Entities

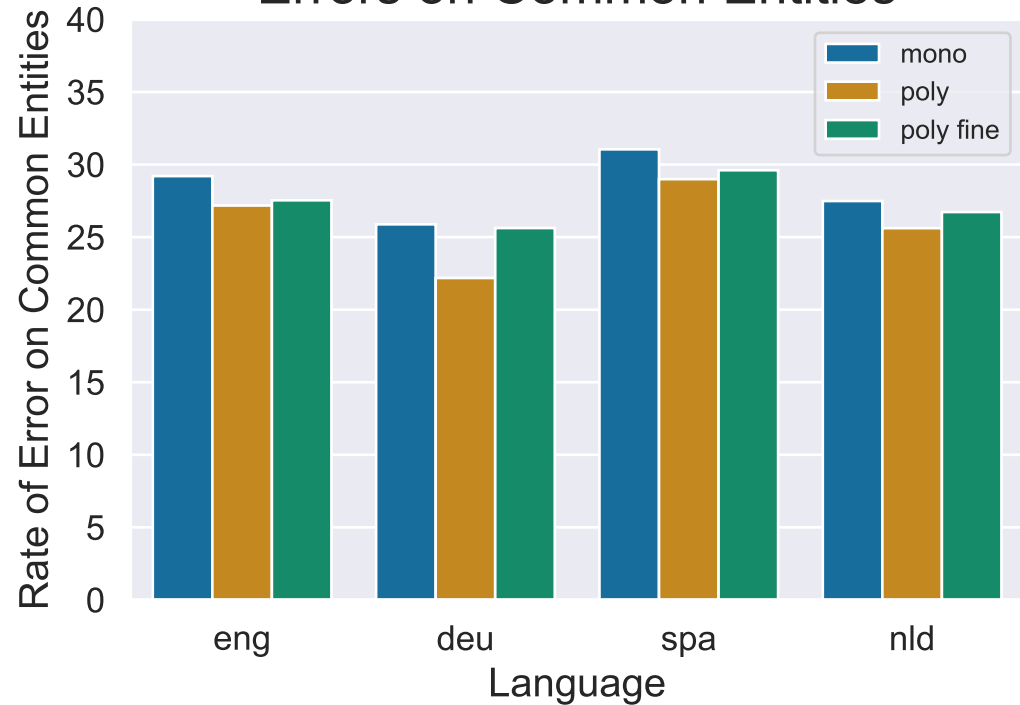

Supplement: Software [file 2020.acl-main.720.Software.zip]

(a) LRL Byte-CRF Error Differences

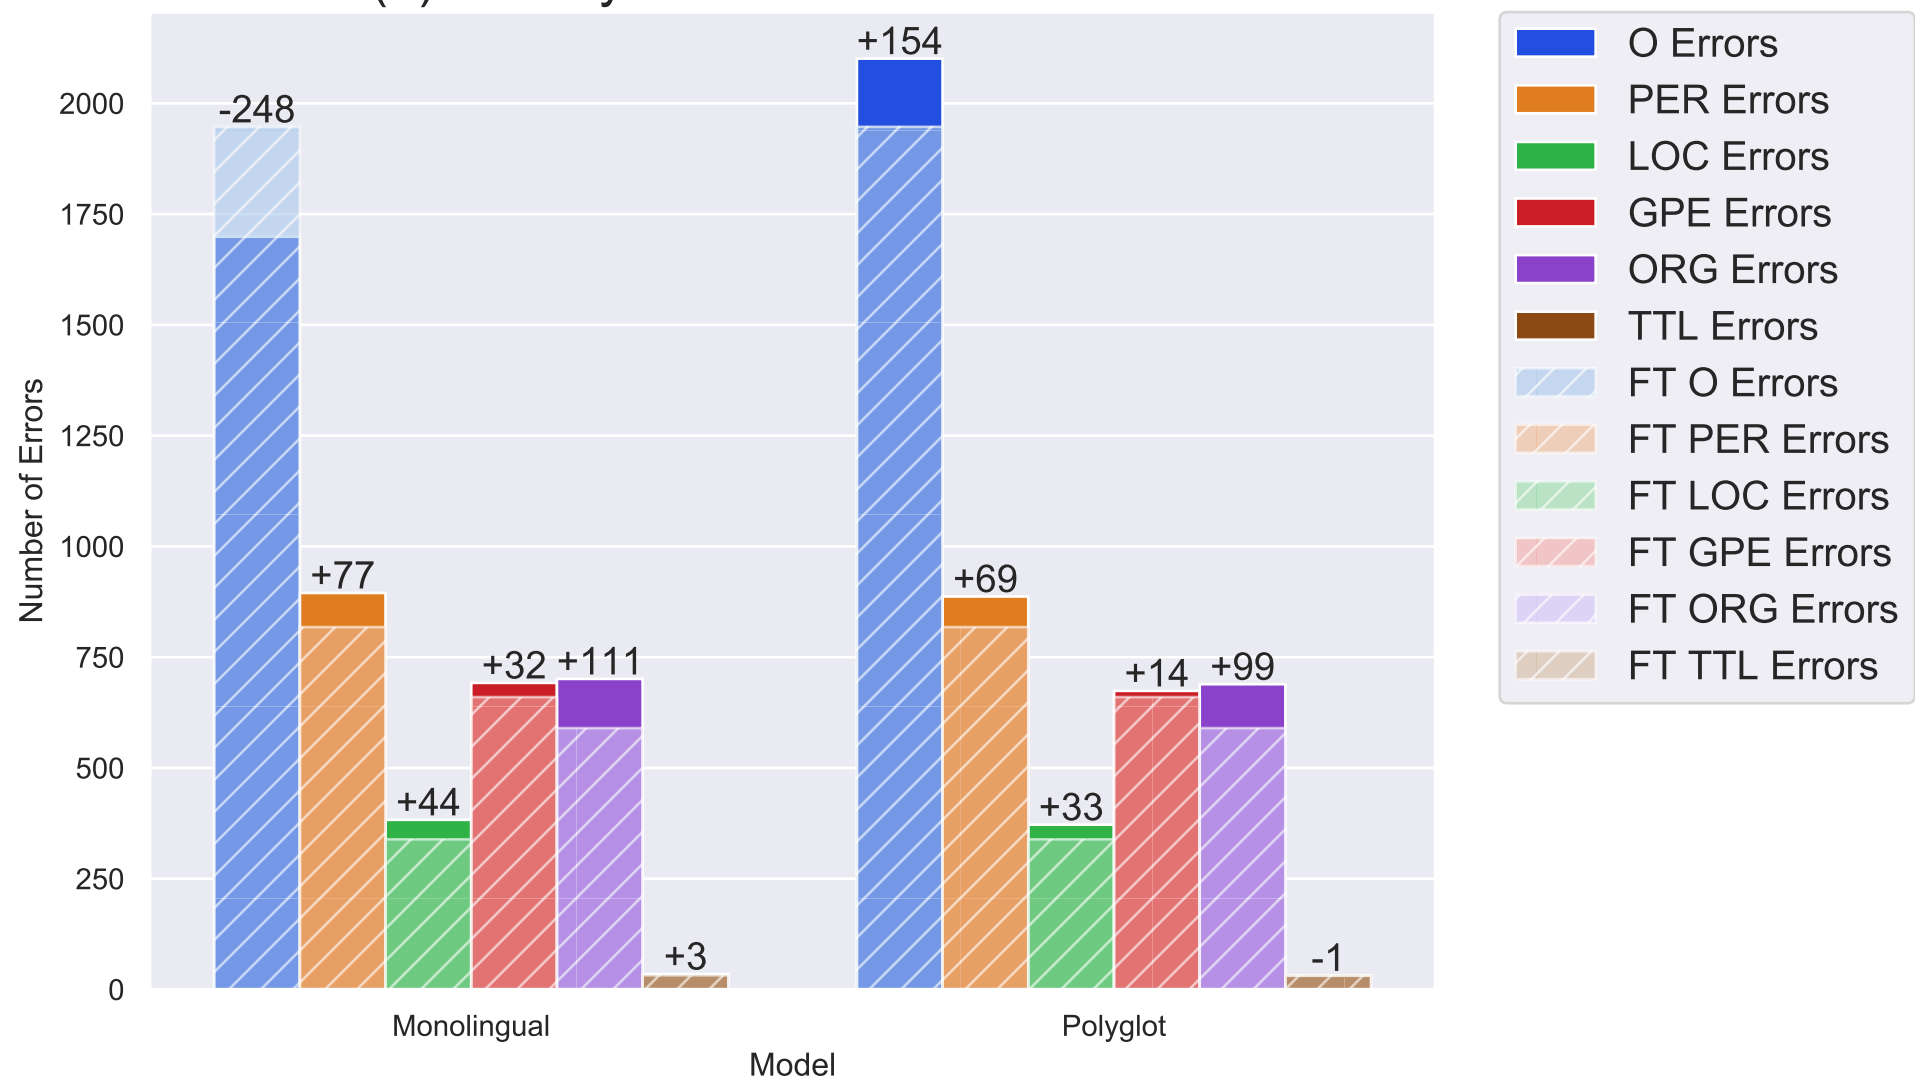

(b) CoNLL Byte-CRF Error Differences

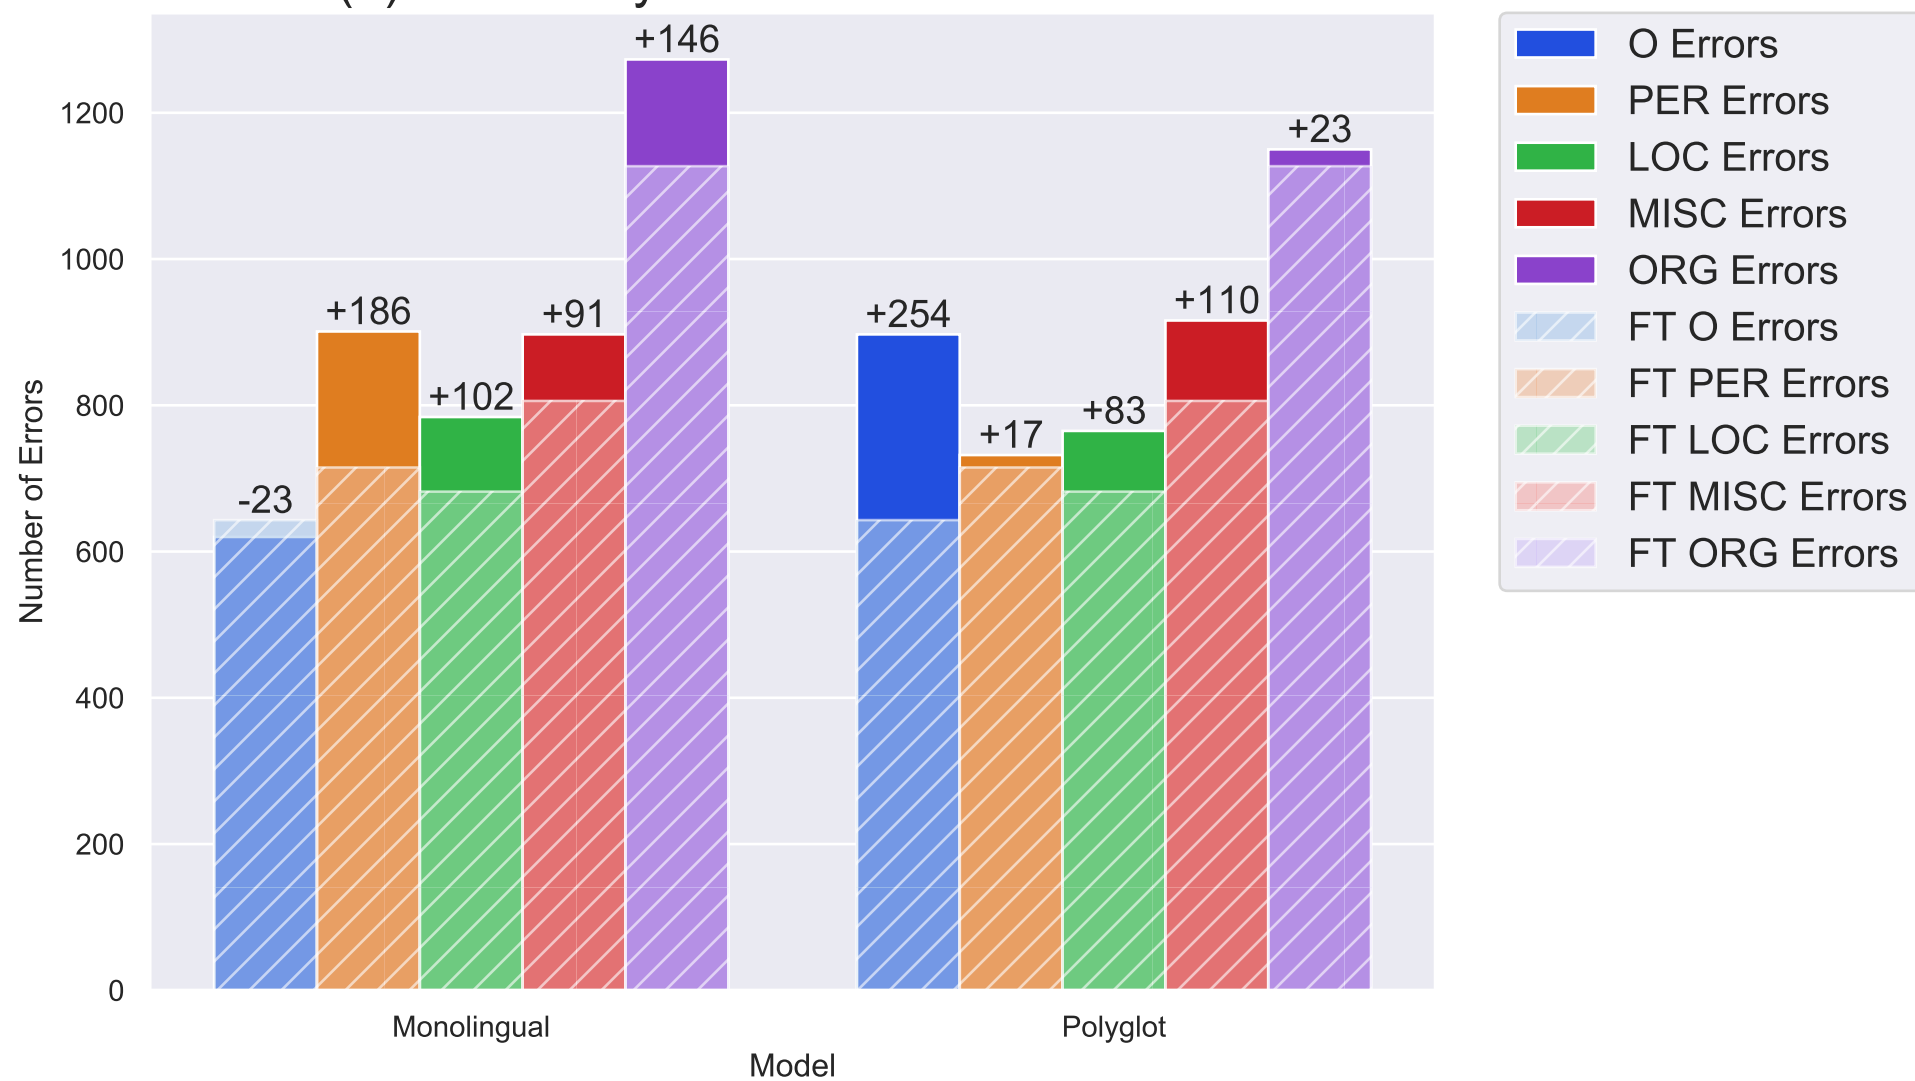

Supplement: Software [file 2020.acl-main.720.Software.zip]

(a) Overlap of Important Weights in Poly Model

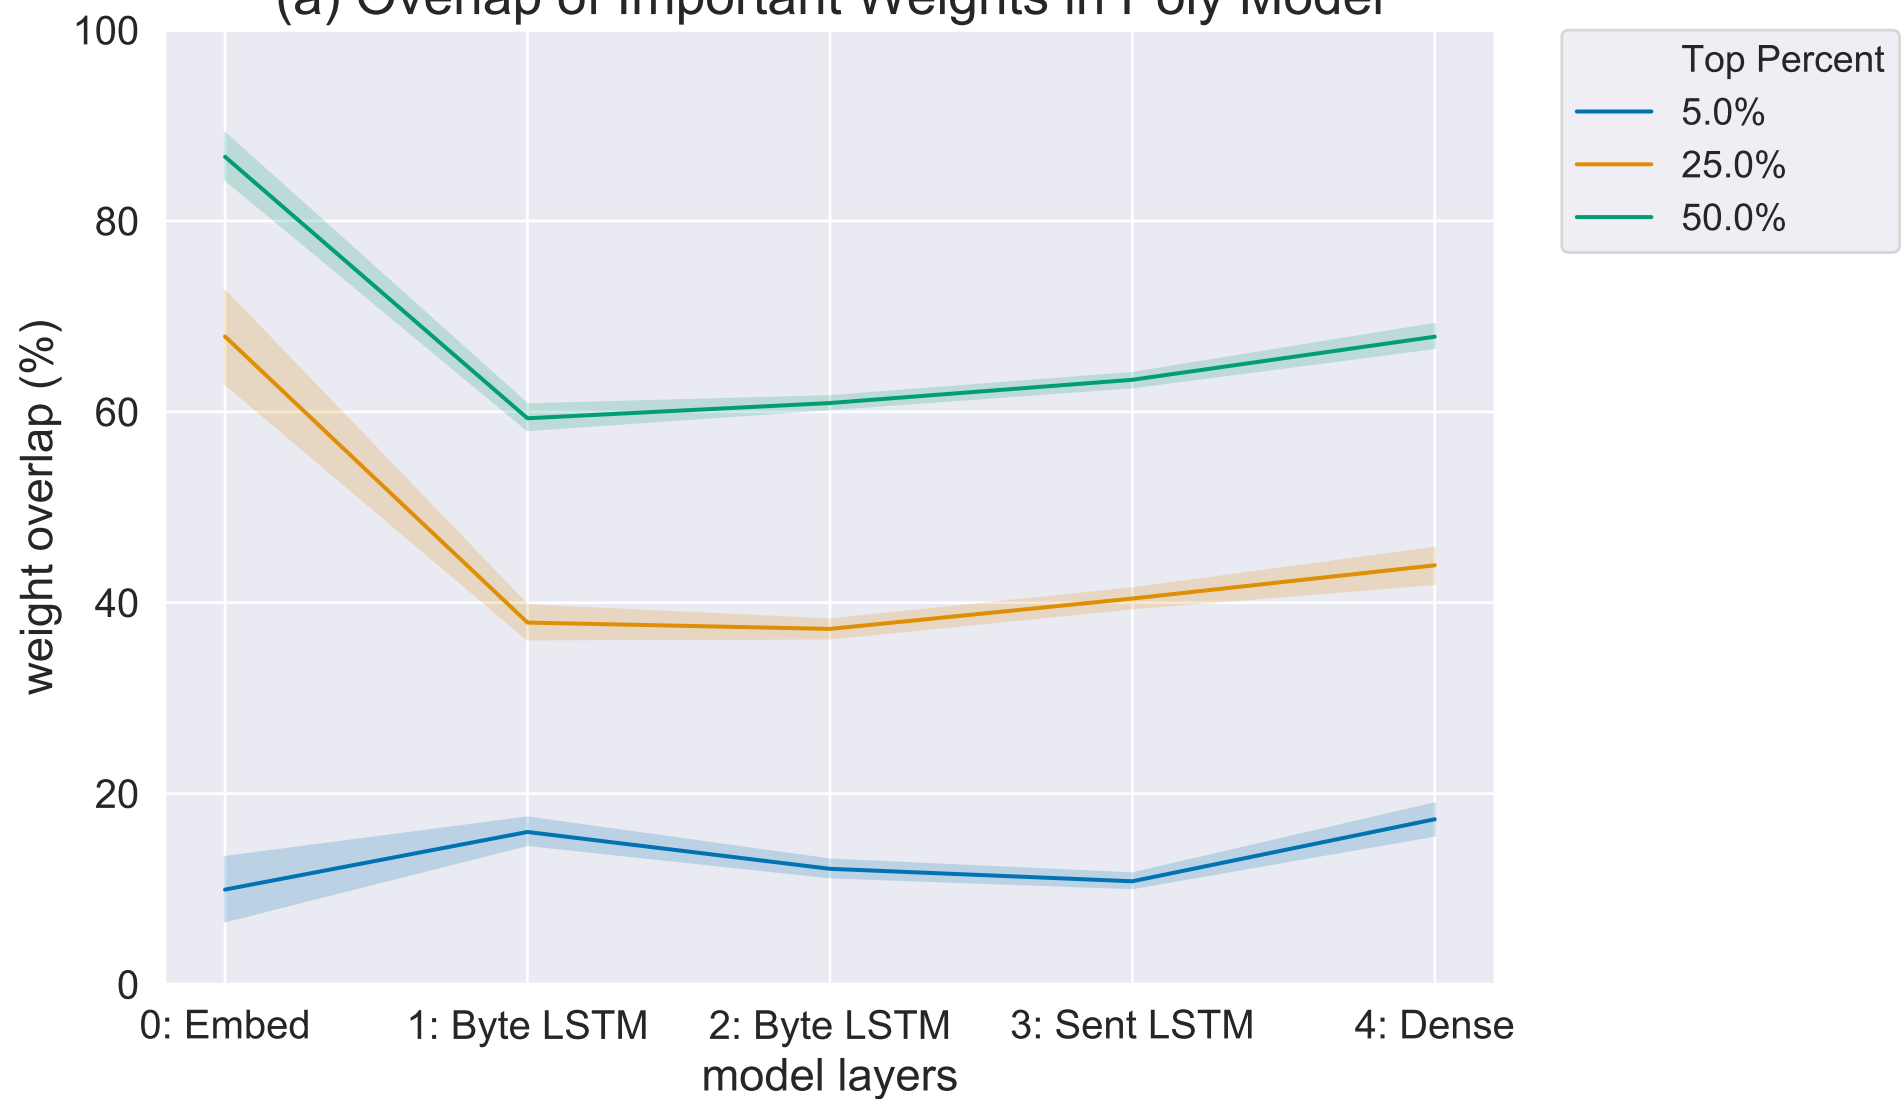

(b) Poly to Finetune Important Weight Retention

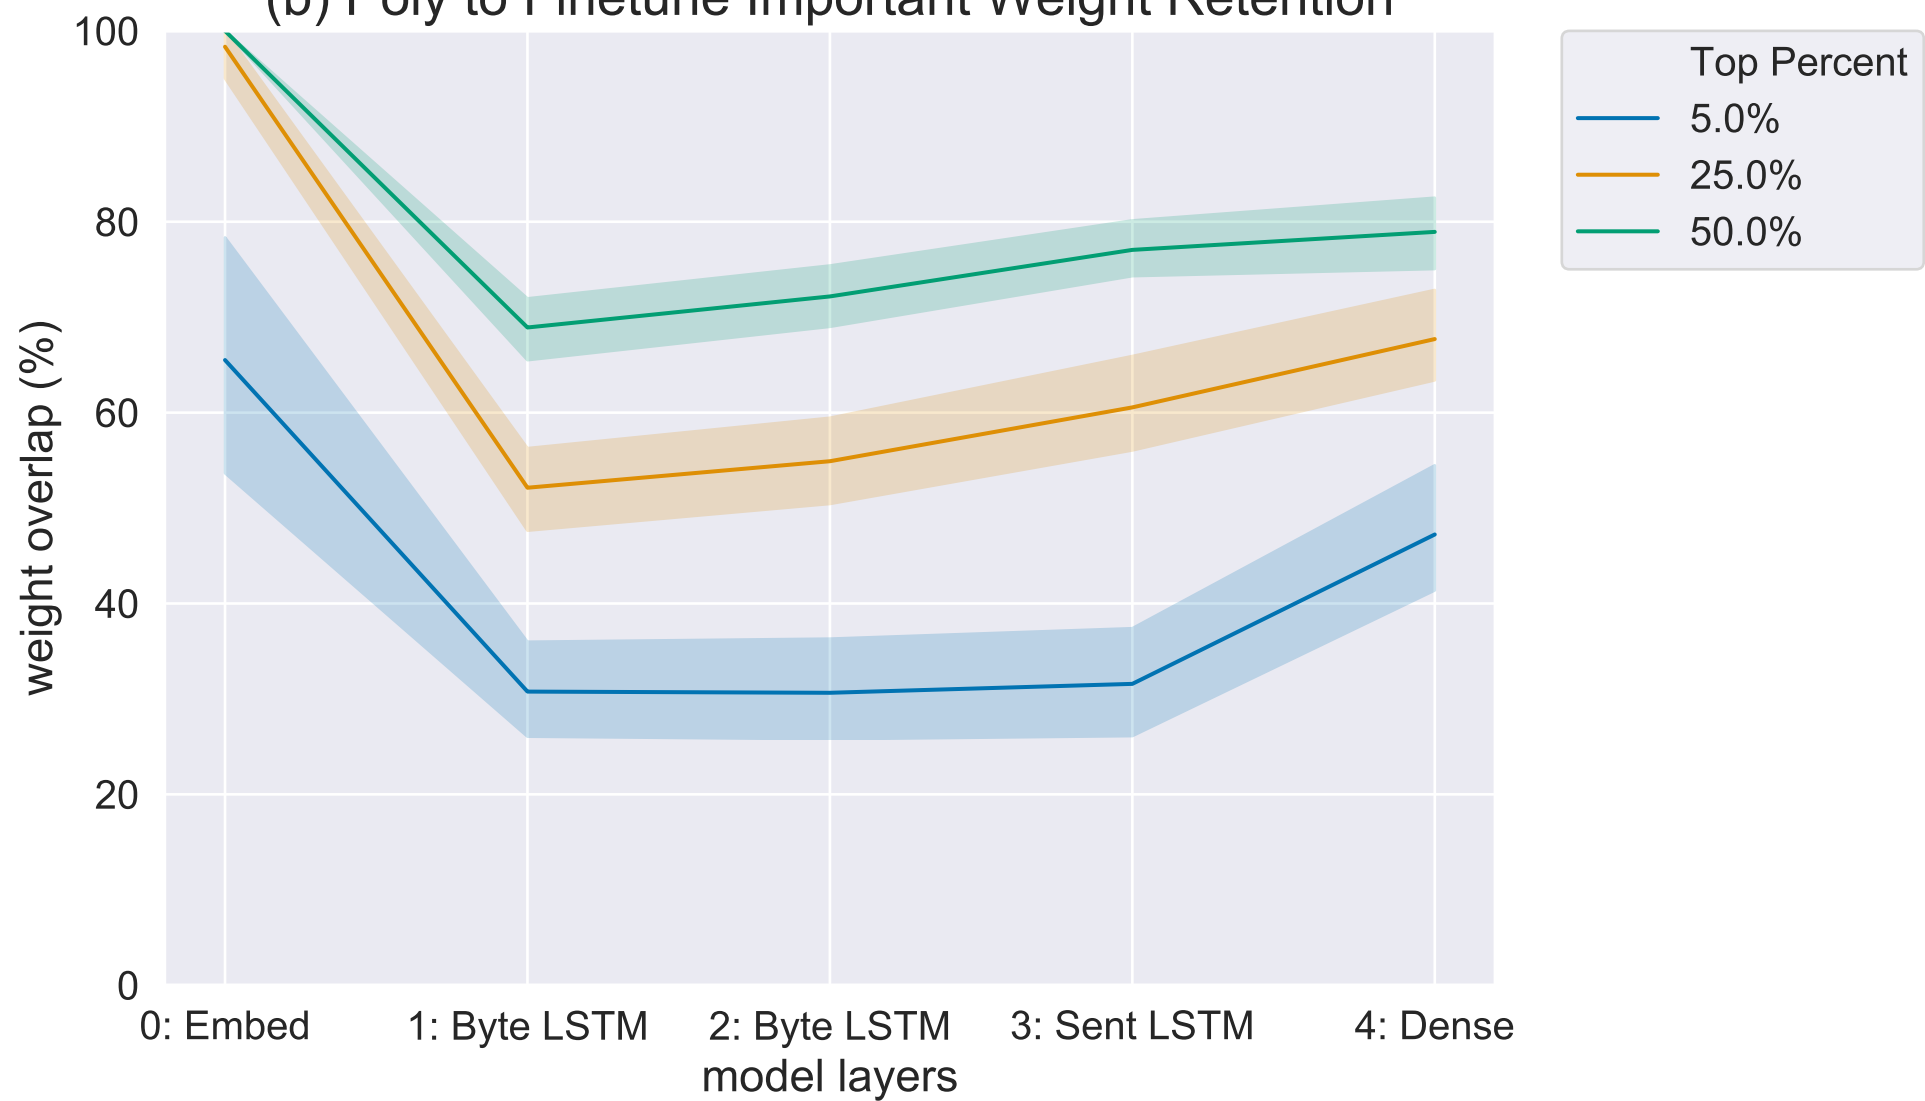

Supplement: Software [file 2020.acl-main.720.Software.zip]
